# Supplementary material for: Phenothiazine based sensor for naked-eye detection and bioimaging of Hg(ii) and F− ions
Source: Royal Society of Chemistry journal article supplement (doi:10.1039/c5ra19341a), 2015-01-01
Supplement: c5ra19341a1.pdf [file c5ra19341a1.pdf]

# Supporting Information

for

## Phenothiazine based sensor for naked-eye detection and bioimaging of Hg(II) and F<sup>-</sup> ions

K. Muthu Vengaiyan,<sup>a</sup> C. Denzil Britto,<sup>a</sup> Gandhi Sivaraman,<sup>c</sup> Karuppannan Sekar,<sup>\*a</sup> and Subramanian Singaravadivel<sup>\*b</sup>

<sup>a</sup> Department of Chemistry, Anna University – University College of Engineering, Dindigul – 624622, India.

<sup>b</sup> Department of Chemistry, SSM Institute of Engineering and Technology, Dindigul – 624002, India.

<sup>c</sup> Institute for stem cell biology and regenerative medicine, Bangalore-560065, India

E-mail: karuppanansekar@gmail.com

| <b>Table of contents</b>                                  | <b>Page No.</b> |
|-----------------------------------------------------------|-----------------|
| 1. NMR Spectra-----                                       | 2, 7            |
| 2. Mass Spectra (ESI-MS) -----                            | 3, 6            |
| 3. UV-Visible Spectra -----                               | 4, 8            |
| 4. Fluorescence Spectral data -----                       | 5               |
| 5. UV and Visible light Photo of sensor selectivity ----- | 9               |
| 7. IR Spectra -----                                       | 10, 11          |
| 8. Percentage of cell survival -----                      | 12              |

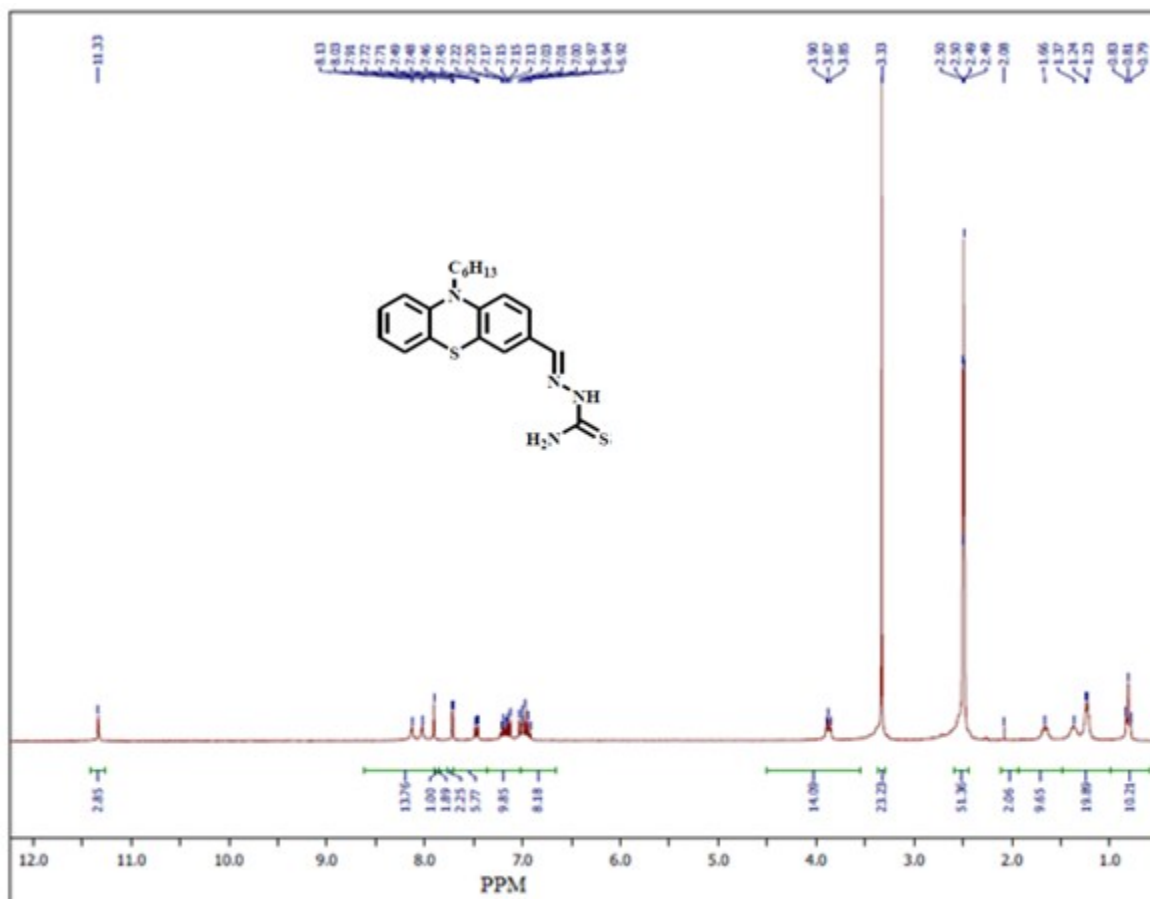

Figure S1:  $^1\text{H}$  NMR spectrum of P-1

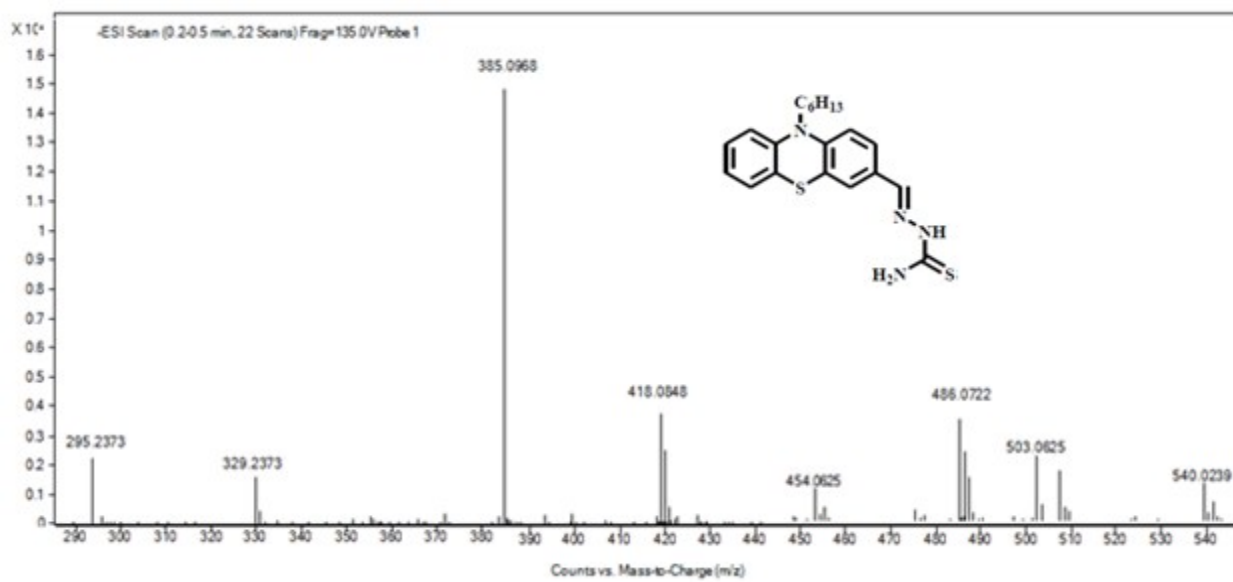

**Figure S2:** ESI-MS spectrum of **P-1**

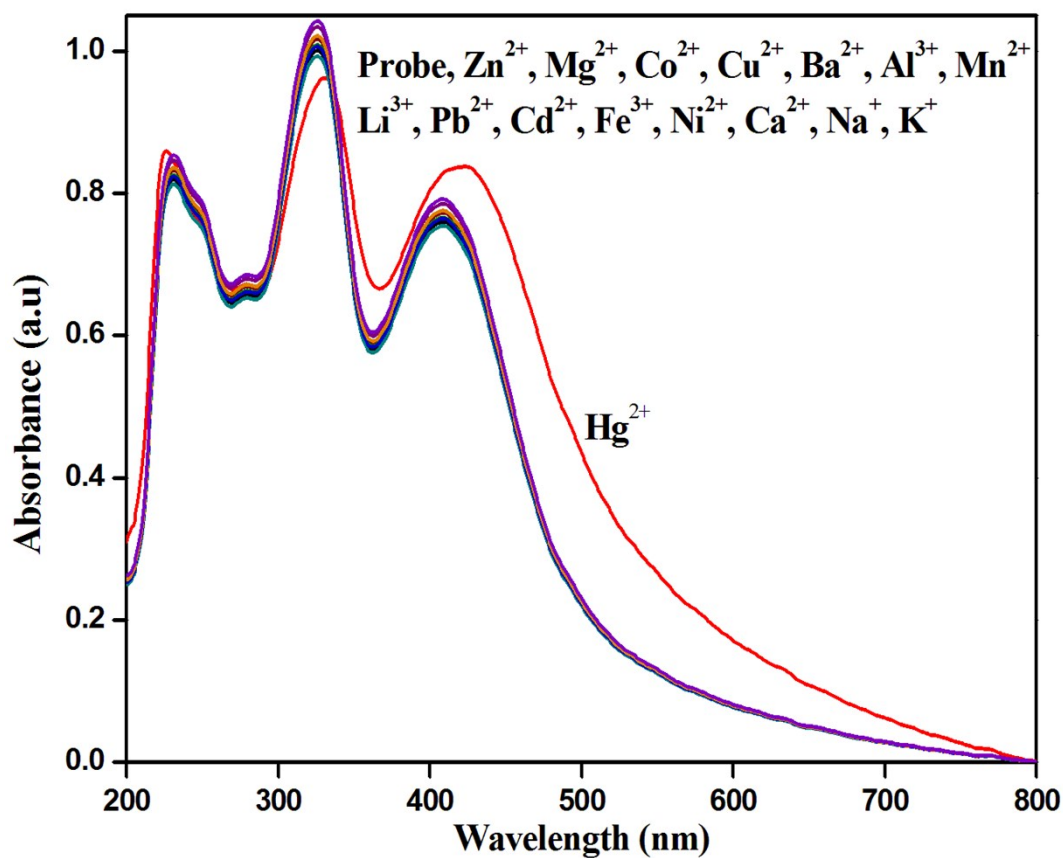

**Figure S3:** UV-vis spectrum of P-1 (10 μM) in the presence of Zn<sup>2+</sup>, Mg<sup>2+</sup>, Co<sup>2+</sup>, Cu<sup>2+</sup>, Ba<sup>2+</sup>, Al<sup>3+</sup>, Mn<sup>2+</sup>, Li<sup>3+</sup>, Pb<sup>2+</sup>, Hg<sup>2+</sup>, Cd<sup>2+</sup>, Fe<sup>3+</sup>, Ni<sup>2+</sup>, Ca<sup>2+</sup>, Na<sup>+</sup> and K<sup>+</sup> (10 μM) in ethanol-water (7:3) mixture.

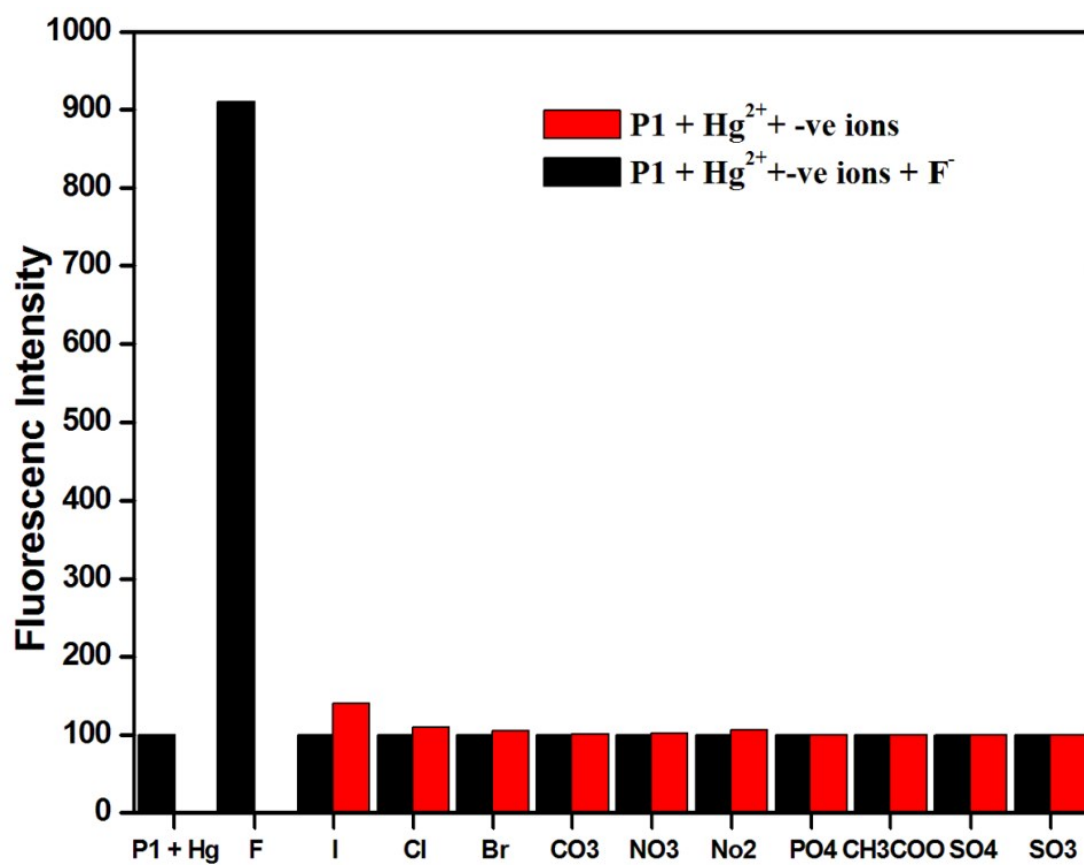

**Figure S4:** Fluorescence spectral data of [P-1 + Hg<sup>2+</sup>] ensemble (10 μM) with 5 equiv. of negative ions F<sup>-</sup>, I<sup>-</sup>, Cl<sup>-</sup>, Br<sup>-</sup>, CO<sub>3</sub><sup>2-</sup>, NO<sub>3</sub><sup>-</sup>, NO<sub>2</sub><sup>-</sup>, PO<sub>4</sub><sup>3-</sup>, CH<sub>3</sub>COO<sup>-</sup>, CN<sup>-</sup>, SO<sub>4</sub><sup>2-</sup> and SO<sub>3</sub><sup>2-</sup>.

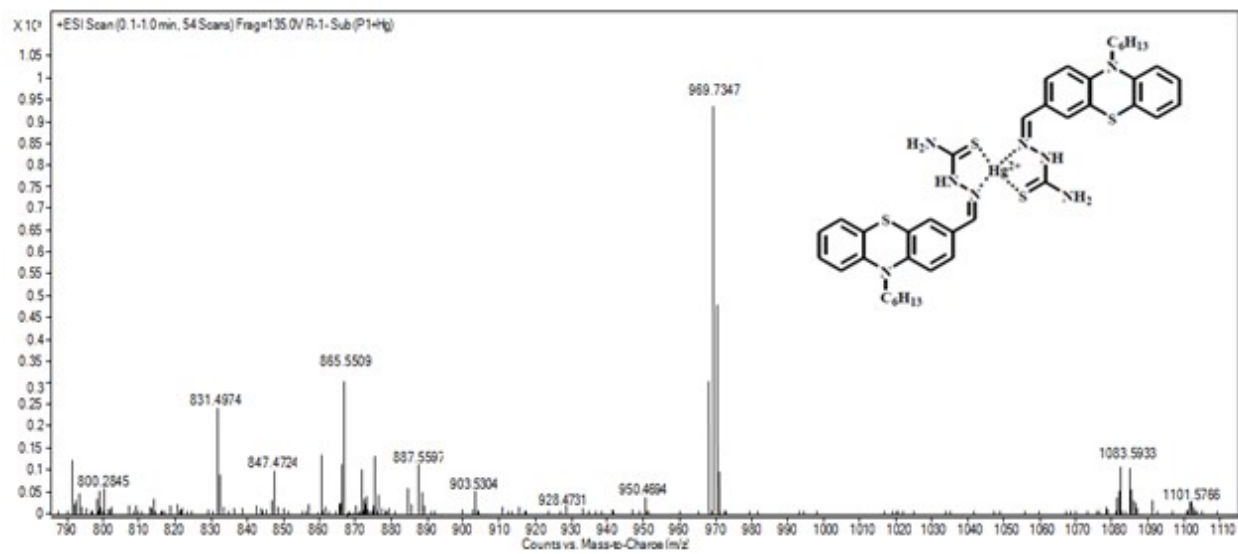

**Figure S5:** ESI-MS spectrum of **P-1** + Hg<sup>2+</sup>

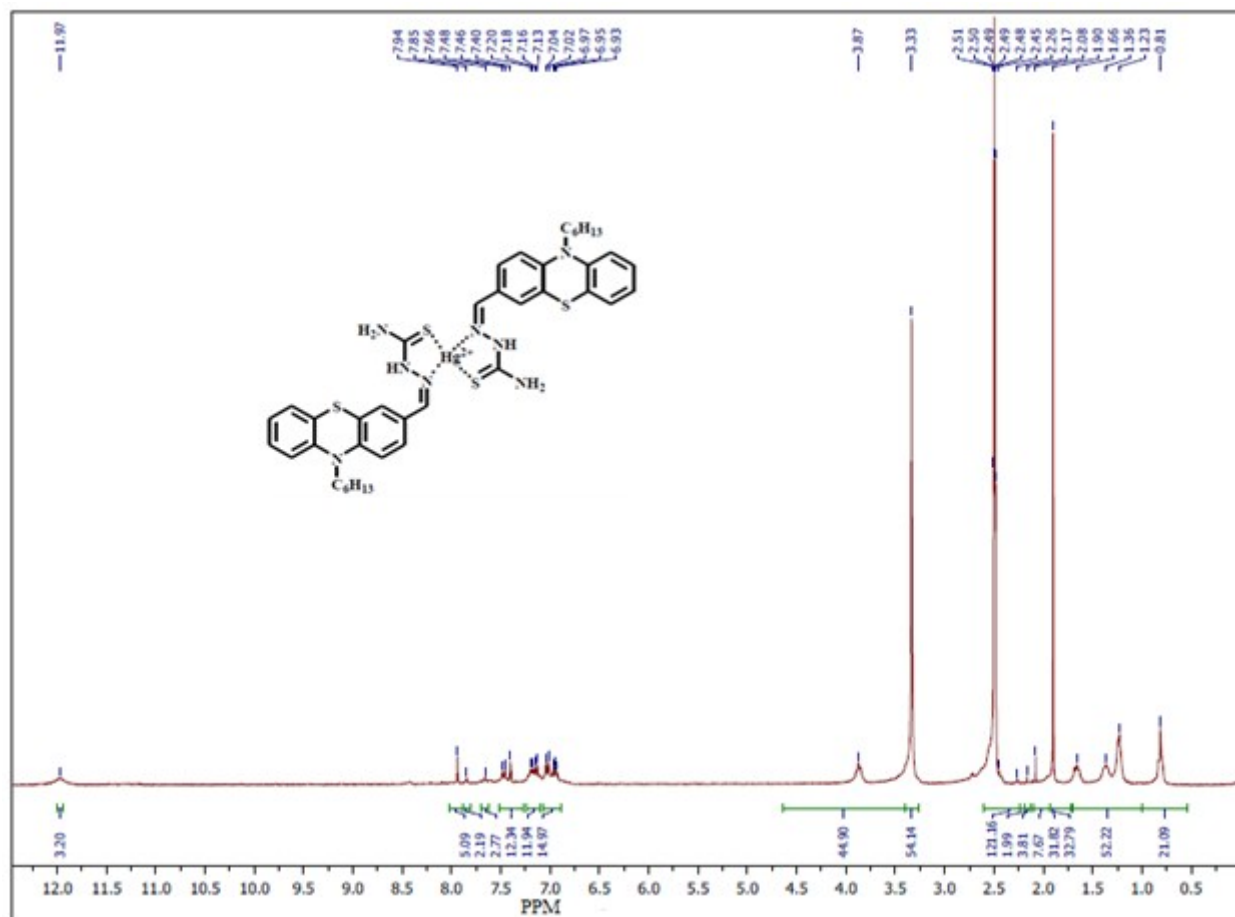

Figure S6: <sup>1</sup>H NMR spectrum of P-1 + Hg<sup>2+</sup>

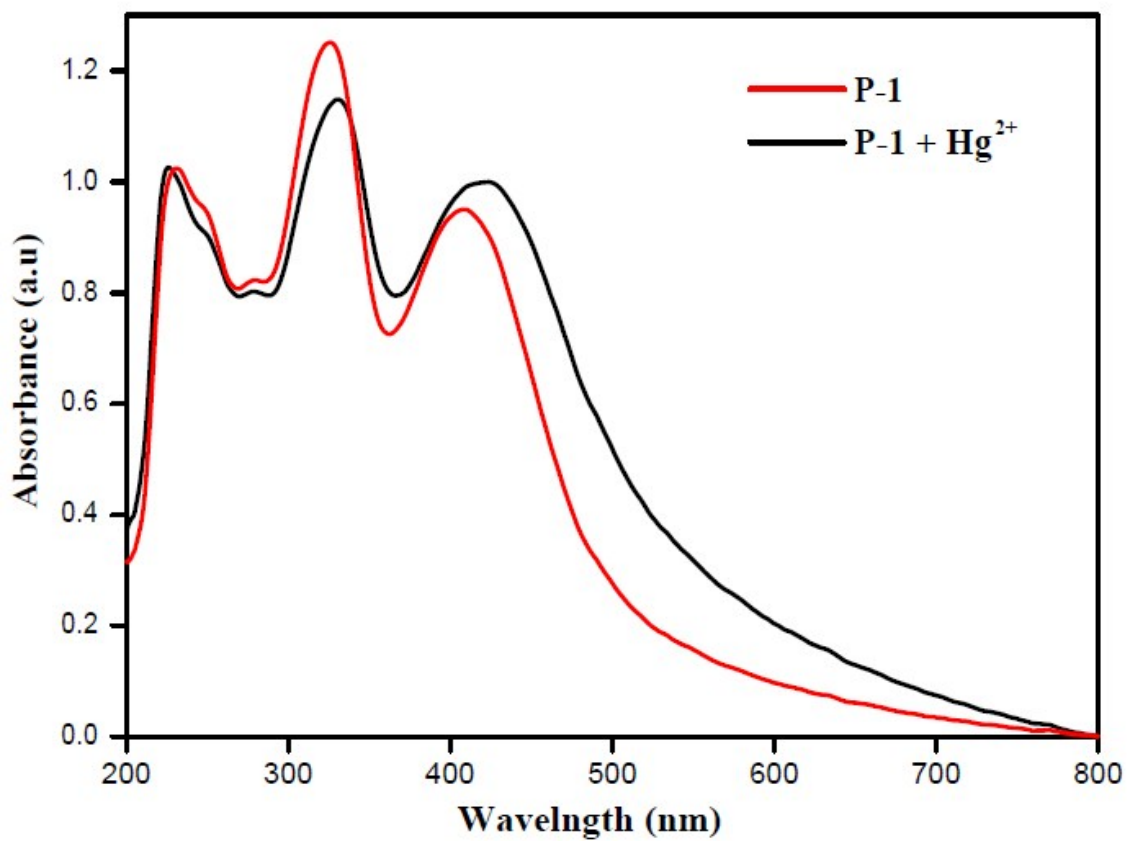

**Figure S7:** UV-vis spectrum of probe and P-1 + Hg<sup>2+</sup> (10  $\mu$ M) in ethanol-water (7:3) mixture



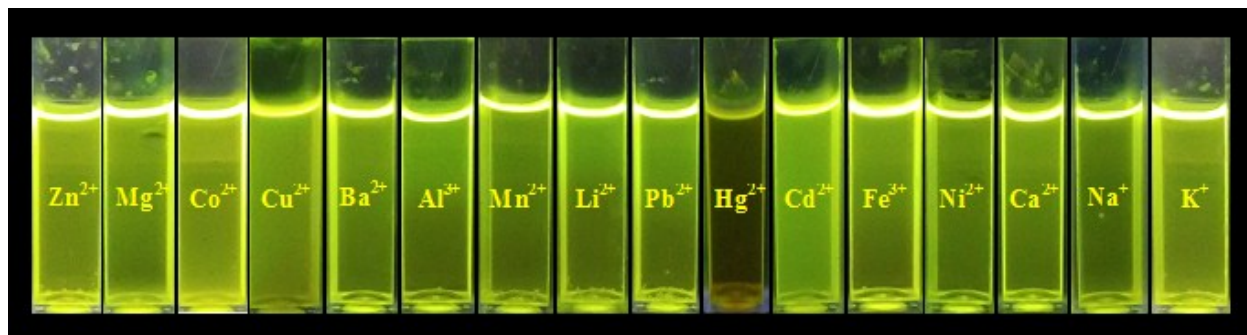

**Figure S8:** UV-Light Photograph of solutions of **P-1**(10 μM) in the presence of various metal ions (10 μM) under illumination.

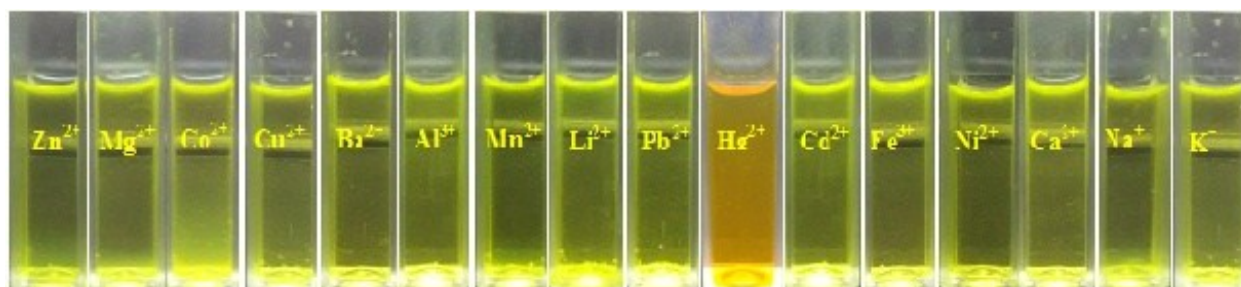

**Figure S9:** Visible Light Photograph of solutions of **P-1**(10 μM) in the presence of various metal ions (10 μM) under illumination.

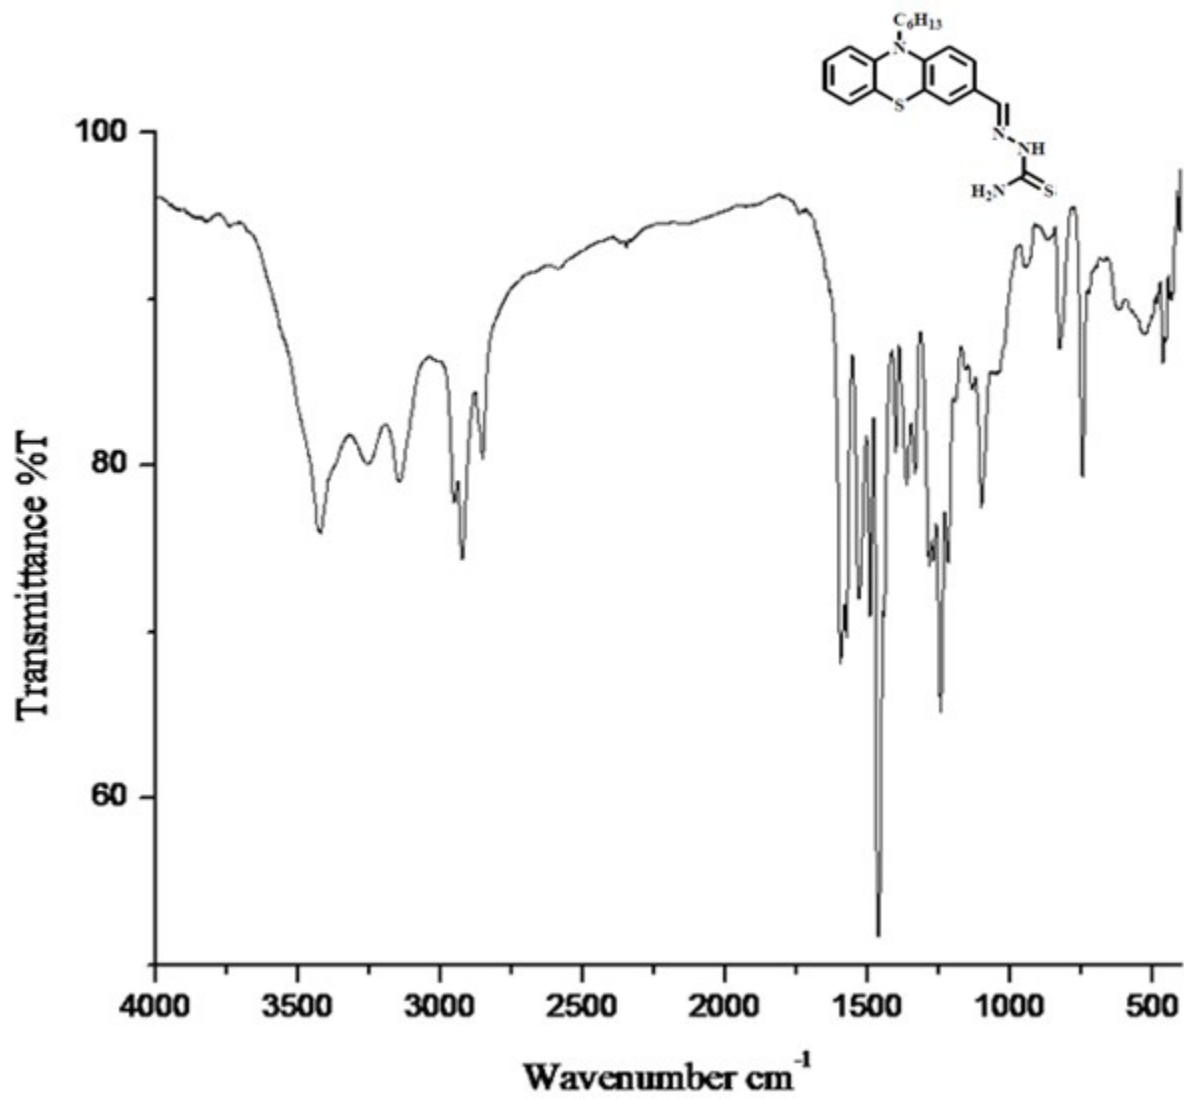

Figure S10: IR spectra of probe P-1

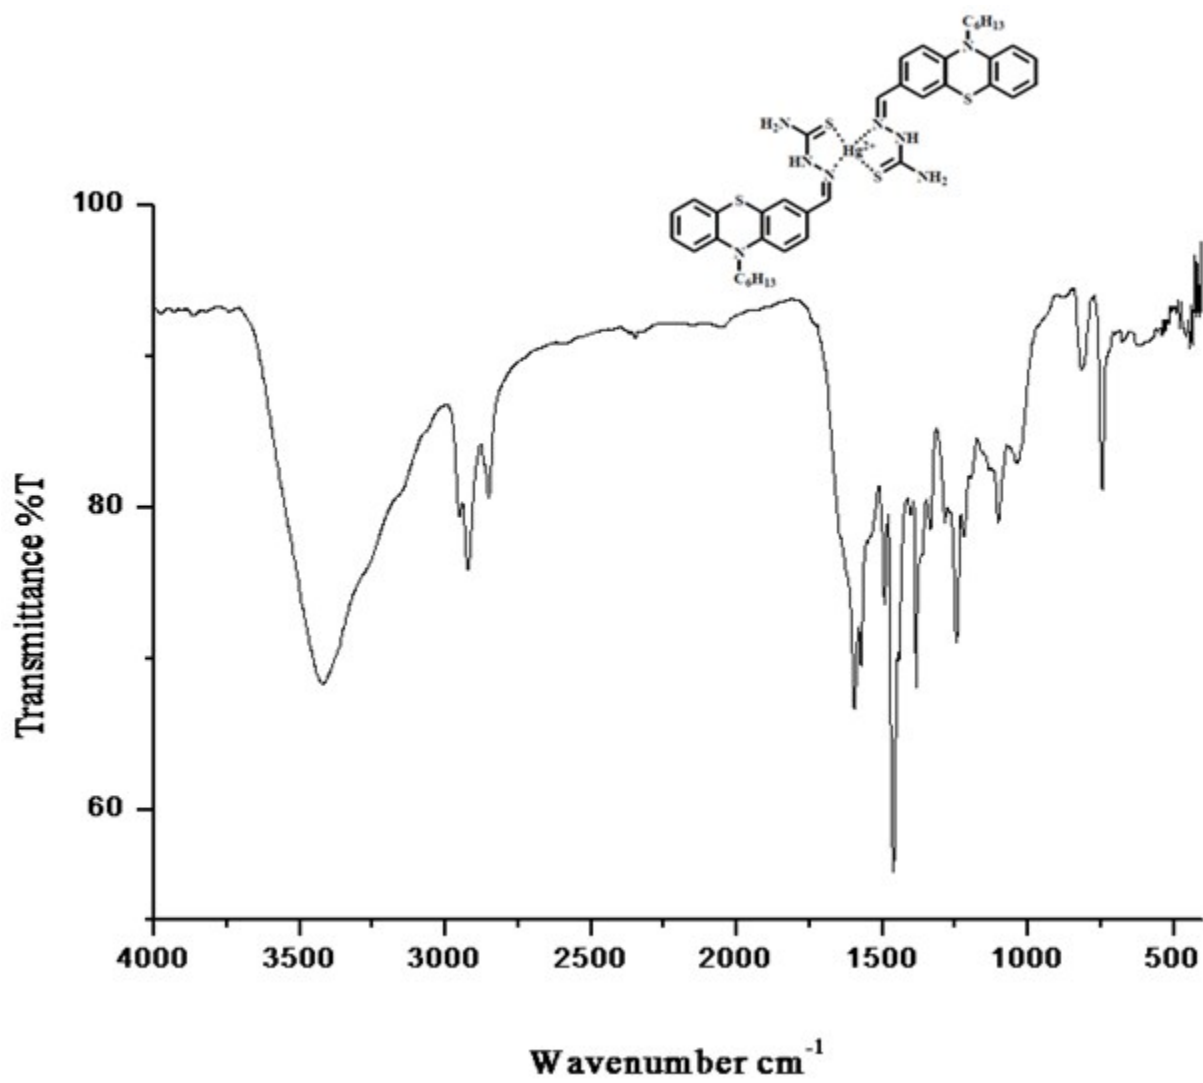

**Figure S11:** IR spectra of probe P-1 + Hg<sup>2+</sup>

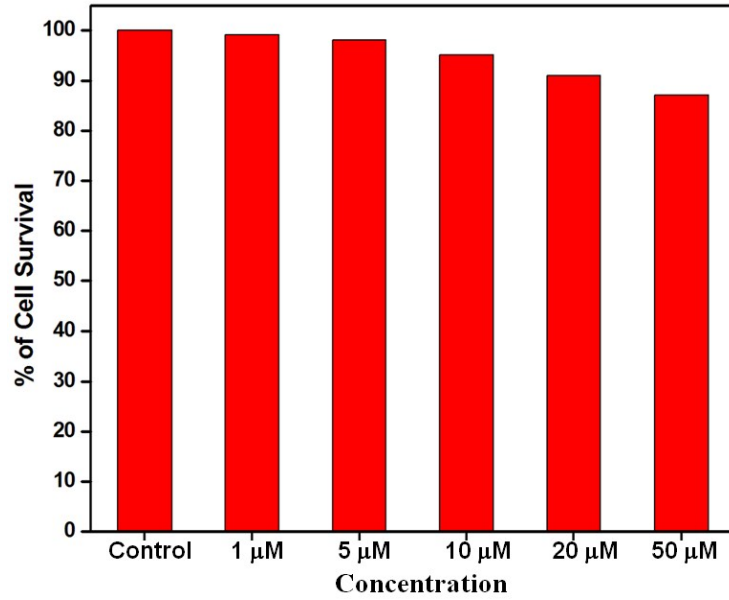

**Figure S11:** Percentage (%) of cell survival of HeLa cells treated with different concentrations (1-20 μM/mL) of P-1.

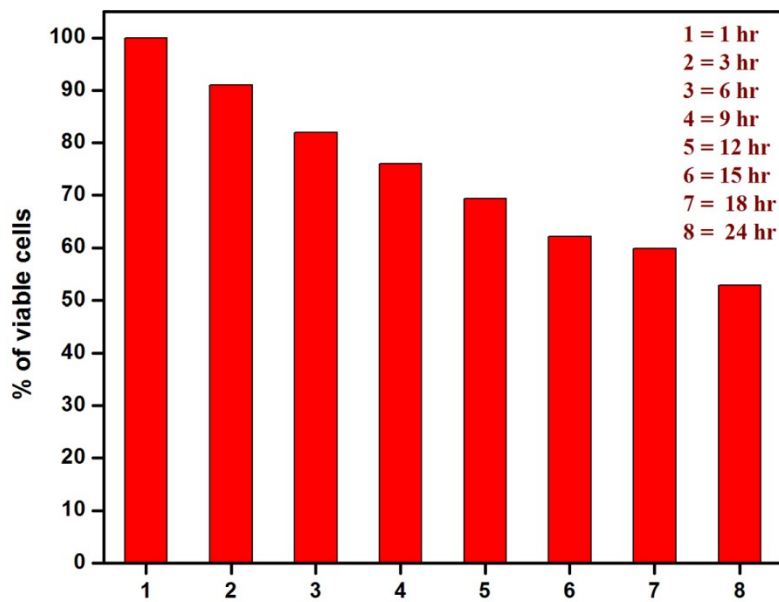

**Figure S12:** Percentage (%) of cell survival of HeLa cells treated with different time intervals with concentrations of 20 μM/mL of P-1.
